# Supplementary material for: Trends in volumes and survival after hematopoietic cell transplantation in racial/ethnic minorities
Source: PubMed Central journal article supplement — Blood Adv. 2024 Apr 29;8(13):3497–506. doi: 10.1182/bloodadvances.2023012469 (PMC11260842; doi:10.1182/bloodadvances.2023012469), 2024-04-29
Supplement: BLOODA_ADV-2023-012469-mmc1.pdf [file BLOODA_ADV-2023-012469-mmc1.pdf]

Table 1: Breakdown of Others group

|                                           | Autologous HCT (n=2445) | Allogeneic HCT (n=3131) |
|-------------------------------------------|-------------------------|-------------------------|
| Asians                                    | 2029                    | 2676                    |
| Native Hawaiian or other Pacific Islander | 137                     | 184                     |
| American Indian or Alaska Native          | 279                     | 271                     |

Abbreviations: HCT, hematopoietic cell transplantation

Table 2: Characteristics of Patients Based on Race/ Ethnicity Who Underwent and Registered Autologous Transplantation to CIBMTR, 2009 to 2018 (Data obtained from Transplant Essential Data forms)

| Variable                                                        | Hispanics<br>(n=7110) | Non-<br>Hispanic<br>Whites<br>(n=59666) | Non-<br>Hispanic<br>African<br>Americans<br>(n=10683) | Others<br>(n=2445) | P<br>value         |
|-----------------------------------------------------------------|-----------------------|-----------------------------------------|-------------------------------------------------------|--------------------|--------------------|
| <b>Year of transplant - n (%)</b>                               |                       |                                         |                                                       |                    | <0.01 <sup>a</sup> |
| 2009-2010                                                       | 977 (14)              | 10048 (17)                              | 1556 (15)                                             | 345 (14)           |                    |
| 2011-2012                                                       | 1215 (17)             | 11632 (19)                              | 1937 (18)                                             | 407 (17)           |                    |
| 2013-2014                                                       | 1375 (19)             | 12234 (21)                              | 2103 (20)                                             | 476 (19)           |                    |
| 2015-2016                                                       | 1647 (23)             | 12632 (21)                              | 2419 (23)                                             | 574 (23)           |                    |
| 2017-2018                                                       | 1896 (27)             | 13120 (22)                              | 2668 (25)                                             | 643 (26)           |                    |
| <b>Age; Median (range)</b>                                      | 55 (18-80)            | 60 (18-85)                              | 57 (18-81)                                            | 57 (18-82)         | <0.01 <sup>a</sup> |
| <b>Males; n (%)</b>                                             | 4272 (60)             | 36688 (61)                              | 5479 (51)                                             | 1409 (58)          | <0.01 <sup>a</sup> |
| <b>Karnofsky score at HCT&lt;80; n (%)</b>                      | 713 (10)              | 6559 (11)                               | 1329 (12)                                             | 235 (10)           | <0.01 <sup>a</sup> |
| <b>Primary disease – n (%)</b>                                  |                       |                                         |                                                       |                    | <0.01 <sup>a</sup> |
| Acute myelogenous leukemia                                      | 61 (1)                | 374 (1)                                 | 66 (1)                                                | 30 (1)             |                    |
| Acute lymphoblastic leukemia                                    | 15 (0)                | 50 (0)                                  | 5 (0)                                                 | 6 (0)              |                    |
| Other leukemia                                                  | 3 (0)                 | 42 (0)                                  | 4 (0)                                                 | 0 (0)              |                    |
| Myelodysplastic/myeloproliferative disorders                    | 0 (0)                 | 4 (0)                                   | 0 (0)                                                 | 0 (0)              |                    |
| Other acute leukemia                                            | 3 (0)                 | 23 (0)                                  | 3 (0)                                                 | 1 (0)              |                    |
| Non-Hodgkin lymphoma                                            | 1893 (27)             | 18612 (31)                              | 1417 (13)                                             | 835 (34)           |                    |
| Hodgkin lymphoma                                                | 839 (12)              | 4728 (8)                                | 858 (8)                                               | 202 (8)            |                    |
| Plasma cell disorder/Multiple Myeloma                           | 3939 (55)             | 34430 (58)                              | 8236 (77)                                             | 1291 (53)          |                    |
| Other Malignancies                                              | 343 (5)               | 1281 (2)                                | 82 (1)                                                | 70 (3)             |                    |
| Breast Cancer                                                   | 0 (0)                 | 7 (0)                                   | 0 (0)                                                 | 0 (0)              |                    |
| Severe aplastic anemia                                          | 0 (0)                 | 2 (0)                                   | 0 (0)                                                 | 0 (0)              |                    |
| Inherited abnormalities erythrocyte differentiation or function | 0 (0)                 | 1 (0)                                   | 2 (0)                                                 | 0 (0)              |                    |
| SCID and other immune system disorders                          | 3 (0)                 | 4 (0)                                   | 0 (0)                                                 | 2 (0)              |                    |
| Histiocytic disorders                                           | 1 (0)                 | 6 (0)                                   | 3 (0)                                                 | 0 (0)              |                    |
| Autoimmune Diseases                                             | 9 (0)                 | 85 (0)                                  | 7 (0)                                                 | 8 (0)              |                    |
| Other, specify                                                  | 1 (0)                 | 17 (0)                                  | 0 (0)                                                 | 0 (0)              |                    |
| <b>United States region - n (%)</b>                             |                       |                                         |                                                       |                    | <0.01 <sup>a</sup> |
| West                                                            | 2577 (36)             | 11339 (19)                              | 855 (8)                                               | 1140 (47)          |                    |
| Midwest                                                         | 651 (9)               | 18340 (31)                              | 2196 (21)                                             | 308 (13)           |                    |

|                                          |            |            |            |            |                    |
|------------------------------------------|------------|------------|------------|------------|--------------------|
| South                                    | 2744 (39)  | 18084 (30) | 5877 (55)  | 557 (23)   |                    |
| Northeast                                | 1138 (16)  | 11903 (20) | 1755 (16)  | 440 (18)   |                    |
| <b>Follow-up - median (range) months</b> | 48 (0-135) | 58 (0-136) | 49 (0-133) | 48 (1-131) | <0.01 <sup>a</sup> |

<sup>a</sup> Pearson chi-square test

Abbreviations: HCT, hematopoietic cell transplantation; SCID Severe combined immunodeficiency

Table 3: Characteristics of Patients Based on Race/ Ethnicity Who Underwent and Registered Autologous Transplantation to CIBMTR, 2009 to 2018 (Data obtained from Comprehensive Report forms)

| Variable                                                                         | Hispanics<br>(n=583) | Non-Hispanic<br>Whites<br>(n=4730) | Non-Hispanic<br>African<br>Americans<br>(n=2180) | Others<br>(n=395) | P value           |
|----------------------------------------------------------------------------------|----------------------|------------------------------------|--------------------------------------------------|-------------------|-------------------|
| <b>Year of transplant<br/>n (%)</b>                                              |                      |                                    |                                                  |                   | <.01 <sup>a</sup> |
| 2009-2010                                                                        | 64 (11)              | 713 (15)                           | 179 (8)                                          | 18 (5)            |                   |
| 2011-2012                                                                        | 66 (11)              | 614 (13)                           | 135 (6)                                          | 22 (6)            |                   |
| 2013-2014                                                                        | 153 (26)             | 1089 (23)                          | 402 (18)                                         | 78 (20)           |                   |
| 2015-2016                                                                        | 130 (22)             | 1032 (22)                          | 684 (31)                                         | 127 (32)          |                   |
| 2017-2018                                                                        | 170 (29)             | 1282 (27)                          | 780 (36)                                         | 150 (38)          |                   |
| <b>Age; Median (range)</b>                                                       | 55 (18-78)           | 61 (18-80)                         | 58 (18-79)                                       | 60 (19-82)        | <.01 <sup>a</sup> |
| <b>Males; n (%)</b>                                                              | 338 (58)             | 2882 (61)                          | 1065 (49)                                        | 211 (53)          | <.01 <sup>a</sup> |
| <b>Karnofsky score at<br/>HCT&lt;80; n (%)</b>                                   | 65 (11)              | 496 (10)                           | 307 (14)                                         | 42 (11)           | <.01 <sup>a</sup> |
| <b>HCT-CI &gt;3; n (%)</b>                                                       | 195 (33)             | 1856 (39)                          | 1028 (47)                                        | 169 (43)          | <.01 <sup>a</sup> |
| <b>Primary disease - n<br/>(%)</b>                                               |                      |                                    |                                                  |                   | <.01 <sup>a</sup> |
| Non-Hodgkin<br>lymphoma                                                          | 161 (28)             | 1477 (31)                          | 277 (13)                                         | 134 (34)          |                   |
| Hodgkin<br>lymphoma                                                              | 69 (12)              | 319 (7)                            | 148 (7)                                          | 27 (7)            |                   |
| Plasma cell<br>disorder/Multiple<br>Myeloma                                      | 353 (61)             | 2934 (62)                          | 1755 (81)                                        | 234 (59)          |                   |
| <b>Disease status<br/>(Lymphoma) - n (%)</b>                                     |                      |                                    |                                                  |                   | <.01 <sup>a</sup> |
| CR                                                                               | 132 (22.6)           | 1133 (24.0)                        | 252 (11.6)                                       | 104 (26.3)        |                   |
| PR                                                                               | 83 (14.2)            | 548 (11.6)                         | 140 (6.4)                                        | 49 (12.4)         |                   |
| Chemo resistant                                                                  | 14 (2.4)             | 105 (2.2)                          | 28 (1.3)                                         | 7 (1.8)           |                   |
| Untreated                                                                        | 0 (0.0)              | 3 (0.1)                            | 1 (0.0)                                          | 1 (0.3)           |                   |
| Unknown                                                                          | 1 (0.2)              | 7 (0.1)                            | 4 (0.2)                                          | 0 (0.0)           |                   |
| N/A, other disease                                                               | 353 (60.5)           | 2934 (62.0)                        | 1755 (80.5)                                      | 234 (59.2)        |                   |
| <b>Disease status prior<br/>to transplant<br/>(Multiple Myeloma)<br/>- n (%)</b> |                      |                                    |                                                  |                   | <.01 <sup>a</sup> |
| CR                                                                               | 70 (12.0)            | 440 (9.3)                          | 257 (11.8)                                       | 45 (11.4)         |                   |
| VGPR                                                                             | 138 (23.7)           | 1051 (22.2)                        | 650 (29.8)                                       | 84 (21.3)         |                   |
| PR                                                                               | 117 (20.1)           | 1197 (25.3)                        | 689 (31.6)                                       | 83 (21.0)         |                   |

|                                           |            |             |            |            |                   |
|-------------------------------------------|------------|-------------|------------|------------|-------------------|
| SD                                        | 24 (4.1)   | 173 (3.7)   | 110 (5.0)  | 14 (3.5)   |                   |
| PD/Relapse                                | 4 (0.7)    | 66 (1.4)    | 40 (1.8)   | 6 (1.5)    |                   |
| N/A, other disease                        | 230 (39.5) | 1796 (38.0) | 425 (19.5) | 161 (40.8) |                   |
| Not reported                              | 0 (0.0)    | 7 (0.1)     | 9 (0.4)    | 2 (0.5)    |                   |
| <b>United States region; n (%)</b>        |            |             |            |            | <.01 <sup>a</sup> |
| West                                      | 114 (20)   | 607 (13)    | 108 (5)    | 129 (33)   |                   |
| Midwest                                   | 69 (12)    | 1857 (39)   | 459 (21)   | 89 (23)    |                   |
| South                                     | 304 (52)   | 1605 (34)   | 1362 (62)  | 125 (32)   |                   |
| Northeast                                 | 96 (16)    | 661 (14)    | 251 (12)   | 52 (13)    |                   |
| <b>Insurance - n (%)</b>                  |            |             |            |            | <.01 <sup>a</sup> |
| No insurance                              | 20 (3)     | 30 (1)      | 37 (2)     | 12 (3)     |                   |
| Medicaid +/- others                       | 159 (27)   | 342 (7)     | 425 (19)   | 71 (18)    |                   |
| Medicare +/- others                       | 86 (15)    | 1255 (27)   | 492 (23)   | 92 (23)    |                   |
| Disability insurance +/- others           | 13 (2)     | 139 (3)     | 69 (3)     | 4 (1)      |                   |
| Private health insurance +/- others       | 290 (50)   | 2851 (60)   | 1088 (50)  | 200 (51)   |                   |
| Other +/- others                          | 12 (2)     | 94 (2)      | 58 (3)     | 14 (4)     |                   |
| Has insurance, source unknown             | 3 (1)      | 7 (0)       | 6 (0)      | 0 (0)      |                   |
| Missing                                   | 0 (0)      | 12 (0)      | 5 (0)      | 2 (1)      |                   |
| <b>Marital status - n (%)</b>             |            |             |            |            | <.01 <sup>a</sup> |
| Single, never married                     | 109 (19)   | 422 (9)     | 500 (23)   | 48 (12)    |                   |
| Married                                   | 375 (64)   | 3614 (76)   | 1136 (52)  | 297 (75)   |                   |
| Separated                                 | 11 (2)     | 40 (1)      | 57 (3)     | 8 (2)      |                   |
| Divorced                                  | 50 (9)     | 414 (9)     | 302 (14)   | 24 (6)     |                   |
| Widowed                                   | 21 (4)     | 142 (3)     | 88 (4)     | 11 (3)     |                   |
| Missing                                   | 17 (3)     | 98 (2)      | 97 (4)     | 7 (2)      |                   |
| <b>Highest Education - n (%)</b>          |            |             |            |            | <.01 <sup>a</sup> |
| No primary education                      | 7 (0)      | 6 (0)       | 1 (0)      | 4 (0)      |                   |
| Less than primary or elementary education | 18 (1)     | 8 (0)       | 4 (0)      | 2 (0)      |                   |

|                                                                              |             |             |             |             |                   |
|------------------------------------------------------------------------------|-------------|-------------|-------------|-------------|-------------------|
| Primary or elementary education                                              | 61 (4)      | 15 (0)      | 2 (0)       | 5 (1)       |                   |
| Lower secondary education                                                    | 88 (6)      | 229 (2)     | 44 (3)      | 21 (2)      |                   |
| Upper secondary education                                                    | 449 (31)    | 3103 (24)   | 423 (32)    | 166 (19)    |                   |
| Post-secondary, non-tertiary education                                       | 118 (8)     | 1125 (9)    | 133 (10)    | 55 (6)      |                   |
| Tertiary education, Type A                                                   | 197 (13)    | 3380 (26)   | 270 (20)    | 235 (27)    |                   |
| Tertiary education, Type B                                                   | 69 (5)      | 738 (6)     | 75 (6)      | 39 (4)      |                   |
| Advanced research qualification                                              | 29 (2)      | 639 (5)     | 44 (3)      | 70 (8)      |                   |
| Missing                                                                      | 429 (29)    | 3641 (28)   | 342 (26)    | 276 (32)    |                   |
| <b>Current employment - n (%)</b>                                            |             |             |             |             | <.01 <sup>a</sup> |
| Full time                                                                    | 174 (30)    | 1539 (33)   | 622 (29)    | 103 (26)    |                   |
| Part time                                                                    | 18 (3)      | 208 (4)     | 66 (3)      | 17 (4)      |                   |
| Unemployed                                                                   | 93 (16)     | 282 (6)     | 195 (9)     | 32 (8)      |                   |
| Medical disability                                                           | 92 (16)     | 559 (12)    | 450 (21)    | 39 (10)     |                   |
| Retired                                                                      | 95 (16)     | 1610 (34)   | 579 (27)    | 118 (30)    |                   |
| PT,by choice and not due to illness                                          | 0 (0)       | 36 (1)      | 11 (1)      | 4 (1)       |                   |
| PT,due to illness                                                            | 2 (0)       | 16 (0)      | 11 (1)      | 3 (1)       |                   |
| Unemployed,by choice and not due to illness                                  | 9 (2)       | 27 (1)      | 19 (1)      | 10 (3)      |                   |
| Unemployed,due to illness                                                    | 19 (3)      | 36 (1)      | 42 (2)      | 13 (3)      |                   |
| Missing                                                                      | 81 (14)     | 417 (9)     | 185 (8)     | 56 (14)     |                   |
| <b>Distance from residence to Transplant center in miles; Median (range)</b> | 21 (0-1602) | 38 (0-2679) | 19 (0-1641) | 20 (0-4001) | <.01 <sup>a</sup> |
| <b>% below national poverty level in Patient's 5-digit</b>                   | 15 (0-55)   | 9 (0-73)    | 16 (0-60)   | 9 (0-60)    | <.01 <sup>a</sup> |

|                                       |            |            |            |            |                   |
|---------------------------------------|------------|------------|------------|------------|-------------------|
| <b>ZIP , Median<br/>(range)</b>       |            |            |            |            |                   |
| <b>Follow-up - median<br/>(range)</b> | 46 (0-119) | 49 (1-136) | 37 (0-129) | 36 (1-122) | <.01 <sup>a</sup> |

<sup>a</sup> Pearson chi-square test

Abbreviations: HCT, hematopoietic cell transplantation; CR, complete remission; PR, partial remission; VGPR, very good partial remission, SD, stable disease; PD, progressive disease

Table 4: Characteristics of Patients Based on Race/ Ethnicity Who Underwent and Registered Allogeneic Transplantation to CIBMTR, 2009 to 2018 (Data obtained from Transplant Essential Data forms)

| Variable                                                        | Hispanics<br>(n=8358) | Non-<br>Hispanic<br>Whites<br>(n=48778) | Non-<br>Hispanic<br>African<br>Americans<br>(n=5395) | Others<br>(n=3131) | P value            |
|-----------------------------------------------------------------|-----------------------|-----------------------------------------|------------------------------------------------------|--------------------|--------------------|
| <b>Year of transplant, n (%)</b>                                |                       |                                         |                                                      |                    | <0.01 <sup>a</sup> |
| 2009-2010                                                       | 1346 (16)             | 8689 (18)                               | 862 (16)                                             | 493 (16)           |                    |
| 2011-2012                                                       | 1499 (18)             | 9590 (20)                               | 934 (17)                                             | 598 (19)           |                    |
| 2013-2014                                                       | 1641 (20)             | 10188<br>(21)                           | 1098 (20)                                            | 643 (21)           |                    |
| 2015-2016                                                       | 1866 (22)             | 10002<br>(21)                           | 1179 (22)                                            | 672 (21)           |                    |
| 2017-2018                                                       | 2006 (24)             | 10309<br>(21)                           | 1322 (25)                                            | 725 (23)           |                    |
| <b>Age; Median (range)</b>                                      | 31 (0-81)             | 55 (0-88)                               | 37 (0-77)                                            | 41 (0-79)          | <0.01 <sup>a</sup> |
| <b>Males; n (%)</b>                                             | 4734 (57)             | 28943<br>(59)                           | 2908 (54)                                            | 1662 (53)          | <0.01 <sup>a</sup> |
| <b>Karnofsky score at HCT&lt;80; n (%)</b>                      | 667 (8)               | 6055 (12)                               | 519 (10)                                             | 311 (10)           | <0.01 <sup>a</sup> |
| <b>Primary disease, n (%)</b>                                   |                       |                                         |                                                      |                    | <0.01 <sup>a</sup> |
| Acute myelogenous leukemia                                      | 2370 (28)             | 18669<br>(38)                           | 1520 (28)                                            | 1132 (36)          |                    |
| Acute lymphoblastic leukemia                                    | 2493 (30)             | 5972 (12)                               | 623 (12)                                             | 526 (17)           |                    |
| Other leukemia                                                  | 72 (1)                | 1680 (3)                                | 159 (3)                                              | 27 (1)             |                    |
| Chronic myelogenous leukemia                                    | 275 (3)               | 1429 (3)                                | 249 (5)                                              | 87 (3)             |                    |
| Myelodysplastic/myeloproliferative disorders                    | 765 (9)               | 9572 (20)                               | 536 (10)                                             | 442 (14)           |                    |
| Other acute leukemia                                            | 149 (2)               | 463 (1)                                 | 70 (1)                                               | 55 (2)             |                    |
| Non-Hodgkin lymphoma                                            | 596 (7)               | 5176 (11)                               | 528 (10)                                             | 270 (9)            |                    |
| Hodgkin lymphoma                                                | 192 (2)               | 1006 (2)                                | 130 (2)                                              | 52 (2)             |                    |
| Plasma cell disorder/Multiple Myeloma                           | 131 (2)               | 1169 (2)                                | 161 (3)                                              | 54 (2)             |                    |
| Other Malignancies                                              | 5 (0)                 | 72 (0)                                  | 6 (0)                                                | 1 (0)              |                    |
| Breast Cancer                                                   | 1 (0)                 | 2 (0)                                   | 0 (0)                                                | 0 (0)              |                    |
| Severe aplastic anemia                                          | 419 (5)               | 1334 (3)                                | 258 (5)                                              | 152 (5)            |                    |
| Inherited abnormalities erythrocyte differentiation or function | 255 (3)               | 534 (1)                                 | 903 (17)                                             | 182 (6)            |                    |
| SCID and other immune system disorders                          | 339 (4)               | 909 (2)                                 | 112 (2)                                              | 89 (3)             |                    |
| Inherited abnormalities of platelets                            | 26 (0)                | 29 (0)                                  | 7 (0)                                                | 9 (0)              |                    |
| Inherited disorders of metabolism                               | 109 (1)               | 377 (1)                                 | 35 (1)                                               | 17 (1)             |                    |
| Histiocytic disorders                                           | 138 (2)               | 286 (1)                                 | 89 (2)                                               | 31 (1)             |                    |
| Autoimmune Diseases                                             | 9 (0)                 | 39 (0)                                  | 4 (0)                                                | 1 (0)              |                    |
| Other, specify                                                  | 14 (0)                | 60 (0)                                  | 5 (0)                                                | 4 (0)              |                    |
| <b>Conditioning intensity, n (%)</b>                            |                       |                                         |                                                      |                    | <0.01 <sup>a</sup> |



|                                            |            |            |            |            |                    |
|--------------------------------------------|------------|------------|------------|------------|--------------------|
| MAC/TBI                                    | 2646 (32)  | 7900 (16)  | 1055 (20)  | 785 (25)   |                    |
| MAC/Chemo                                  | 2453 (29)  | 15020 (31) | 1465 (27)  | 847 (27)   |                    |
| RIC/NMA                                    | 2301 (28)  | 21760 (45) | 2089 (39)  | 1111 (35)  |                    |
| Missing                                    | 958 (11)   | 4098 (8)   | 786 (15)   | 388 (12)   |                    |
| <b>Donor type, n (%)</b>                   |            |            |            |            | <0.01 <sup>a</sup> |
| HLA-identical sibling                      | 3065 (37)  | 14066 (29) | 1639 (30)  | 1098 (35)  |                    |
| Other related                              | 1152 (14)  | 4192 (9)   | 1364 (25)  | 437 (14)   |                    |
| Well-matched unrelated (8/8)               | 1732 (21)  | 22476 (46) | 744 (14)   | 774 (25)   |                    |
| Mismatched unrelated (<8/8)                | 969 (12)   | 3841 (8)   | 672 (12)   | 307 (10)   |                    |
| Multi-donor                                | 36 (0)     | 192 (0)    | 20 (0)     | 8 (0)      |                    |
| Unrelated (matching TBD)                   | 48 (1)     | 675 (1)    | 22 (0)     | 41 (1)     |                    |
| Cord blood                                 | 1356 (16)  | 3334 (7)   | 934 (17)   | 466 (15)   |                    |
| Missing                                    | 0 (0)      | 2 (0)      | 0 (0)      | 0 (0)      |                    |
| <b>Graft type, n (%)</b>                   |            |            |            |            | <0.01 <sup>a</sup> |
| Bone Marrow                                | 2320 (28)  | 9557 (20)  | 1774 (33)  | 779 (25)   |                    |
| Peripheral Blood                           | 4682 (56)  | 35887 (74) | 2687 (50)  | 1886 (60)  |                    |
| Cord Blood                                 | 1356 (16)  | 3334 (7)   | 934 (17)   | 466 (15)   |                    |
| <b>United States region, n (%)</b>         |            |            |            |            | <0.01 <sup>a</sup> |
| West                                       | 3456 (41)  | 9717 (20)  | 542 (10)   | 1489 (48)  |                    |
| Midwest                                    | 841 (10)   | 13562 (28) | 1148 (21)  | 367 (12)   |                    |
| South                                      | 2931 (35)  | 14599 (30) | 2749 (51)  | 678 (22)   |                    |
| Northeast                                  | 1130 (14)  | 10900 (22) | 956 (18)   | 597 (19)   |                    |
| <b>Follow-up in months; Median (range)</b> | 49 (2-127) | 59 (0-135) | 48 (1-126) | 49 (0-126) |                    |

Abbreviations: HCT, hematopoietic cell transplantation; SCID Severe combined immunodeficiency; MAC, myeloablative conditioning; TBI, Total Body irradiation; RIC, Reduced intensity conditioning; NMA, Non-myeloablative conditioning; HLA, human leukocyte antigen

Table 5: Characteristics of Adult Patients Based on Race/ Ethnicity Who Underwent and Registered Allogeneic Transplantation to CIBMTR, 2009 to 2018 (Data obtained from Comprehensive Report forms)

| Variable                                                         | Hispanics<br>(n=1465) | Non-Hispanic<br>Whites<br>(n=12884) | Non-Hispanic<br>African<br>Americans<br>(n=1338) | Others<br>(n=873) | P value            |
|------------------------------------------------------------------|-----------------------|-------------------------------------|--------------------------------------------------|-------------------|--------------------|
| <b>Year of transplant, n (%)</b>                                 |                       |                                     |                                                  |                   | <0.01 <sup>a</sup> |
| 2009-2010                                                        | 270 (18)              | 2473 (19)                           | 193 (14)                                         | 123 (14)          |                    |
| 2011-2012                                                        | 178 (12)              | 1590 (12)                           | 126 (9)                                          | 72 (8)            |                    |
| 2013-2014                                                        | 340 (23)              | 3219 (25)                           | 303 (23)                                         | 215 (25)          |                    |
| 2015-2016                                                        | 344 (23)              | 3068 (24)                           | 368 (28)                                         | 231 (26)          |                    |
| 2017-2018                                                        | 333 (23)              | 2534 (20)                           | 348 (26)                                         | 232 (27)          |                    |
| <b>Age; Median (range)</b>                                       | 46 (18-77)            | 59 (18-88)                          | 50 (18-77)                                       | 51 (18-79)        | <0.01 <sup>a</sup> |
| <b>Males; n (%)</b>                                              | 820 (56)              | 7772 (60)                           | 685 (51)                                         | 453 (52)          | <0.01 <sup>a</sup> |
| <b>Karnofsky score at<br/>HCT&lt;80; n (%)</b>                   | 152 (10)              | 1807 (14)                           | 176 (13)                                         | 99 (11)           | <0.01 <sup>a</sup> |
| <b>HCT-CI&gt;3; n (%)</b>                                        | 554 (38)              | 6221 (48)                           | 665 (50)                                         | 386 (44)          | <0.01 <sup>a</sup> |
| <b>Primary disease, n (%)</b>                                    |                       |                                     |                                                  |                   | <0.01 <sup>a</sup> |
| Acute myelogenous leukemia                                       | 532 (36)              | 4994 (39)                           | 564 (42)                                         | 430 (49)          |                    |
| Acute lymphoblastic leukemia                                     | 447 (31)              | 1113 (9)                            | 189 (14)                                         | 145 (17)          |                    |
| Chronic Lymphocytic leukemia                                     | 19 (1)                | 417 (3)                             | 57 (4)                                           | 7 (1)             |                    |
| Myelodysplastic Syndrome/<br>Myeloproliferative neoplasm         | 285 (19)              | 5106 (40)                           | 290 (22)                                         | 209 (24)          |                    |
| <b>Disease status at time<br/>of HCT (MDS) - no. (%)</b>         |                       |                                     |                                                  |                   | <.01 <sup>a</sup>  |
| MDS early                                                        | 132 (9.0)             | 2150 (16.7)                         | 133 (9.9)                                        | 85 (9.7)          |                    |
| MDS advanced                                                     | 138 (9.4)             | 2691 (20.9)                         | 139 (10.4)                                       | 110 (12.6)        |                    |
| Other                                                            | 15 (1.0)              | 265 (2.1)                           | 18 (1.3)                                         | 14 (1.6)          |                    |
| N/A, other disease                                               | 1180 (80.5)           | 7778 (60.4)                         | 1048 (78.3)                                      | 664 (76.1)        |                    |
| <b>Disease status at time<br/>of HCT (AML/ALL) - no.<br/>(%)</b> |                       |                                     |                                                  |                   | <.01 <sup>a</sup>  |
| PIF                                                              | 77 (5.3)              | 729 (5.7)                           | 79 (5.9)                                         | 64 (7.3)          |                    |
| CR1                                                              | 557 (38.0)            | 3770 (29.3)                         | 414 (30.9)                                       | 357 (40.9)        |                    |
| CR2                                                              | 235 (16.0)            | 1077 (8.4)                          | 157 (11.7)                                       | 117 (13.4)        |                    |
| >=CR3                                                            | 31 (2.1)              | 90 (0.7)                            | 37 (2.8)                                         | 8 (0.9)           |                    |
| Relapse                                                          | 79 (5.4)              | 440 (3.4)                           | 66 (4.9)                                         | 29 (3.3)          |                    |
| N/A, other disease                                               | 486 (33.2)            | 6777 (52.6)                         | 585 (43.7)                                       | 298 (34.1)        |                    |

|                                         |          |           |          |          |                   |
|-----------------------------------------|----------|-----------|----------|----------|-------------------|
| Not reported                            | 0 (0.0)  | 1 (0.0)   | 0 (0.0)  | 0 (0.0)  |                   |
| <b>Conditioning intensity - no. (%)</b> |          |           |          |          | <.01 <sup>a</sup> |
| MAC/TBI                                 | 489 (33) | 2024 (16) | 346 (26) | 225 (26) |                   |
| MAC/Chemo                               | 373 (25) | 3684 (29) | 328 (25) | 216 (25) |                   |
| RIC/NMA                                 | 585 (40) | 6917 (54) | 640 (48) | 409 (47) |                   |
| Missing                                 | 18 (1)   | 259 (2)   | 24 (2)   | 23 (3)   |                   |
| <b>Donor type - no. (%)</b>             |          |           |          |          | <.01 <sup>a</sup> |
| HLA-identical sibling                   | 426 (29) | 3066 (24) | 281 (21) | 228 (26) |                   |
| Other related                           | 256 (17) | 1358 (11) | 385 (29) | 126 (14) |                   |
| Well-matched unrelated (8/8)            | 275 (19) | 6071 (47) | 197 (15) | 238 (27) |                   |
| Mismatched unrelated (<8/8)             | 157 (11) | 953 (7)   | 146 (11) | 69 (8)   |                   |
| Multi-donor                             | 3 (0)    | 45 (0)    | 6 (0)    | 2 (0)    |                   |
| Unrelated (matching TBD)                | 2 (0)    | 23 (0)    | 1 (0)    | 2 (0)    |                   |
| Cord blood                              | 346 (24) | 1368 (11) | 322 (24) | 205 (23) |                   |
| <b>Graft type - no. (%)</b>             |          |           |          |          | <.01 <sup>a</sup> |
| Bone Marrow                             | 181 (12) | 1680 (13) | 190 (14) | 107 (12) |                   |
| Peripheral Blood                        | 938 (64) | 9836 (76) | 826 (62) | 561 (64) |                   |
| Cord Blood                              | 346 (24) | 1368 (11) | 322 (24) | 205 (23) |                   |
| <b>US region, n (%)</b>                 |          |           |          |          | <.01 <sup>a</sup> |
| West                                    | 550 (38) | 2424 (19) | 121 (9)  | 426 (49) |                   |
| Midwest                                 | 147 (10) | 4120 (32) | 329 (25) | 99 (11)  |                   |
| South                                   | 538 (37) | 3609 (28) | 652 (49) | 167 (19) |                   |
| Northeast                               | 230 (16) | 2731 (21) | 236 (18) | 181 (21) |                   |
| <b>Insurance, n (%)</b>                 |          |           |          |          | <.01 <sup>a</sup> |
| No insurance                            | 28 (2)   | 79 (1)    | 16 (1)   | 11 (1)   |                   |
| Medicaid +/- others                     | 475 (32) | 1148 (9)  | 318 (24) | 167 (19) |                   |
| Medicare +/- others                     | 193 (13) | 3561 (28) | 212 (16) | 117 (13) |                   |
| Disability insurance +/- others         | 24 (2)   | 280 (2)   | 47 (4)   | 22 (3)   |                   |
| Private health insurance +/- others     | 674 (46) | 7384 (57) | 680 (51) | 520 (60) |                   |
| Other                                   | 55 (4)   | 310 (2)   | 55 (4)   | 23 (3)   |                   |
| Has insurance, source unknown           | 3 (0)    | 27 (0)    | 2 (0)    | 2 (0)    |                   |
| Missing                                 | 13 (1)   | 95 (1)    | 8 (1)    | 11 (1)   |                   |
| <b>Marital status, n (%)</b>            |          |           |          |          | <.01 <sup>a</sup> |

|                                           |          |           |          |          |                   |
|-------------------------------------------|----------|-----------|----------|----------|-------------------|
| Single, never married                     | 385 (26) | 1501 (12) | 397 (30) | 149 (17) |                   |
| Married                                   | 851 (58) | 9470 (74) | 685 (51) | 605 (69) |                   |
| Separated                                 | 35 (2)   | 120 (1)   | 22 (2)   | 8 (1)    |                   |
| Divorced                                  | 112 (8)  | 1064 (8)  | 144 (11) | 44 (5)   |                   |
| Widowed                                   | 27 (2)   | 362 (3)   | 25 (2)   | 22 (3)   |                   |
| Missing                                   | 55 (4)   | 367 (3)   | 65 (5)   | 45 (5)   |                   |
| <b>Highest Education, n (%)</b>           |          |           |          |          | <.01 <sup>a</sup> |
| No primary education                      | 7 (0)    | 6 (0)     | 1 (0)    | 4 (0)    |                   |
| Less than primary or elementary education | 18 (1)   | 8 (0)     | 4 (0)    | 2 (0)    |                   |
| Primary or elementary education           | 61 (4)   | 15 (0)    | 2 (0)    | 5 (1)    |                   |
| Lower secondary education                 | 88 (6)   | 229 (2)   | 44 (3)   | 21 (2)   |                   |
| Upper secondary education                 | 449 (31) | 3103 (24) | 423 (32) | 166 (19) |                   |
| Post-secondary, non-tertiary education    | 118 (8)  | 1125 (9)  | 133 (10) | 55 (6)   |                   |
| Tertiary education, Type A                | 197 (13) | 3380 (26) | 270 (20) | 235 (27) |                   |
| Tertiary education, Type B                | 69 (5)   | 738 (6)   | 75 (6)   | 39 (4)   |                   |
| Advanced research qualification           | 29 (2)   | 639 (5)   | 44 (3)   | 70 (8)   |                   |
| Missing                                   | 429 (29) | 3641 (28) | 342 (26) | 276 (32) |                   |
| <b>Current employment, n (%)</b>          |          |           |          |          | <.01 <sup>a</sup> |
| Full time                                 | 408 (28) | 3556 (28) | 397 (30) | 248 (28) |                   |
| Part time                                 | 41 (3)   | 518 (4)   | 45 (3)   | 29 (3)   |                   |
| Unemployed                                | 258 (18) | 982 (8)   | 126 (9)  | 108 (12) |                   |
| Medical disability                        | 267 (18) | 2185 (17) | 313 (23) | 136 (16) |                   |
| Retired                                   | 163 (11) | 3879 (30) | 214 (16) | 142 (16) |                   |
| PT,by choice and not due to illness       | 6 (0)    | 110 (1)   | 10 (1)   | 5 (1)    |                   |
| PT,due to illness                         | 6 (0)    | 31 (0)    | 4 (0)    | 4 (0)    |                   |

|                                                                                 |             |             |             |             |                   |
|---------------------------------------------------------------------------------|-------------|-------------|-------------|-------------|-------------------|
| Unemployed,by choice and not due to illness                                     | 22 (2)      | 76 (1)      | 13 (1)      | 13 (1)      |                   |
| Unemployed,due to illness                                                       | 33 (2)      | 133 (1)     | 33 (2)      | 21 (2)      |                   |
| Missing                                                                         | 261 (18)    | 1414 (11)   | 183 (14)    | 167 (19)    |                   |
| <b>Distance from residence to Transplant center in miles; Median (range)</b>    | 23 (0-4766) | 42 (0-2911) | 19 (0-1485) | 21 (0-6132) | <.01 <sup>a</sup> |
| <b>% below national poverty level in Patient's 5-digit ZIP , Median (range)</b> | 15 (0-86)   | 9 (0-77)    | 15 (0-58)   | 9 (0-50)    | <.01 <sup>a</sup> |
| Follow-up - median (range)                                                      | 50 (2-125)  | 59 (2-135)  | 48 (2-123)  | 47 (3-126)  |                   |

Abbreviations: HCT, hematopoietic cell transplantation; SCID Severe combined immunodeficiency; MAC, myeloablative conditioning; TBI, Total Body irradiation; RIC, Reduced intensity conditioning; NMA, Non-myeloablative conditioning; HLA, human leukocyte antigen

Table 6: Characteristics of Pediatric Patients Based on Race/ Ethnicity Who Underwent and Registered Allogeneic Transplantation to CIBMTR, 2009 to 2018 (Data obtained from Comprehensive Report forms)

| Variable                                                     | Hispanics<br>(n=559) | Non-Hispanic<br>Whites<br>(n=893) | Non-Hispanic<br>African<br>Americans<br>(n=236) | Others<br>(n=132) | P value            |
|--------------------------------------------------------------|----------------------|-----------------------------------|-------------------------------------------------|-------------------|--------------------|
| <b>Year of transplant<br/>- no. (%)</b>                      |                      |                                   |                                                 |                   | <.01 <sup>a</sup>  |
| 2009-2010                                                    | 136 (24)             | 303 (34)                          | 50 (21)                                         | 35 (27)           |                    |
| 2011-2012                                                    | 80 (14)              | 112 (13)                          | 22 (9)                                          | 18 (14)           |                    |
| 2013-2014                                                    | 140 (25)             | 195 (22)                          | 61 (26)                                         | 24 (18)           |                    |
| 2015-2016                                                    | 125 (22)             | 182 (20)                          | 54 (23)                                         | 31 (23)           |                    |
| 2017-2018                                                    | 78 (14)              | 101 (11)                          | 49 (21)                                         | 24 (18)           |                    |
| <b>Age; Median<br/>(range)</b>                               | 9 (0-18)             | 9 (0-18)                          | 10 (0-18)                                       | 9 (1-18)          | 0.05 <sup>a</sup>  |
| <b>Males; n (%)</b>                                          | 317 (57)             | 519 (58)                          | 137 (58)                                        | 72 (55)           | 0.85 <sup>a</sup>  |
| <b>Karnofsky<br/>score at<br/>HCT&lt;80; n (%)</b>           | 24 (4)               | 38 (4)                            | 9 (4)                                           | 4 (3)             | 0.98 <sup>a</sup>  |
| <b>HCT-CI &gt;3; no.<br/>(%)</b>                             | 98 (18)              | 140 (16)                          | 38 (16)                                         | 25 (19)           | 0.85 <sup>a</sup>  |
| <b>Primary disease -<br/>no. (%)</b>                         |                      |                                   |                                                 |                   | <0.01 <sup>a</sup> |
| Acute<br>myelogenous<br>leukemia                             | 213 (38)             | 418 (47)                          | 108 (46)                                        | 60 (45)           |                    |
| Acute<br>lymphoblastic<br>leukemia                           | 300 (54)             | 309 (35)                          | 93 (39)                                         | 49 (37)           |                    |
| MDS/MPD                                                      | 33 (6)               | 127 (14)                          | 18 (8)                                          | 16 (12)           |                    |
| <b>Conditioning<br/>intensity - no. (%)</b>                  |                      |                                   |                                                 |                   | 0.04 <sup>a</sup>  |
| MAC/TBI                                                      | 324 (58)             | 453 (51)                          | 121 (51)                                        | 66 (50)           |                    |
| MAC/Chemo                                                    | 191 (34)             | 371 (42)                          | 88 (37)                                         | 53 (40)           |                    |
| RIC/NMA                                                      | 32 (6)               | 44 (5)                            | 22 (9)                                          | 7 (5)             |                    |
| <b>Disease status at<br/>time of HCT<br/>(MDS) - no. (%)</b> |                      |                                   |                                                 |                   | <.01 <sup>a</sup>  |
| MDS early                                                    | 13 (2.3)             | 58 (6.5)                          | 11 (4.7)                                        | 6 (4.5)           |                    |
| MDS advanced                                                 | 9 (1.6)              | 36 (4.0)                          | 5 (2.1)                                         | 3 (2.3)           |                    |
| Other                                                        | 11 (2.0)             | 33 (3.7)                          | 2 (0.8)                                         | 7 (5.3)           |                    |

|                                                          |            |            |            |            |                    |
|----------------------------------------------------------|------------|------------|------------|------------|--------------------|
| N/A, other disease                                       | 526 (94.1) | 766 (85.8) | 218 (92.4) | 116 (87.9) |                    |
| <b>Disease status at time of HCT (AML/ALL) - no. (%)</b> |            |            |            |            | <.01 <sup>a</sup>  |
| PIF                                                      | 25 (4.5)   | 28 (3.1)   | 12 (5.1)   | 3 (2.3)    |                    |
| CR1                                                      | 224 (40.1) | 359 (40.2) | 83 (35.2)  | 57 (43.2)  |                    |
| CR2                                                      | 206 (36.9) | 256 (28.7) | 83 (35.2)  | 40 (30.3)  |                    |
| >=CR3                                                    | 38 (6.8)   | 45 (5.0)   | 10 (4.2)   | 4 (3.0)    |                    |
| Relapse                                                  | 20 (3.6)   | 39 (4.4)   | 13 (5.5)   | 5 (3.8)    |                    |
| N/A, other disease                                       | 46 (8.2)   | 166 (18.6) | 35 (14.8)  | 23 (17.4)  |                    |
| <b>Donor type - no. (%)</b>                              |            |            |            |            | <0.01 <sup>a</sup> |
| HLA-identical sibling                                    | 67 (12)    | 135 (15)   | 26 (11)    | 18 (14)    |                    |
| Other related                                            | 80 (14)    | 52 (6)     | 37 (16)    | 26 (20)    |                    |
| Well-matched unrelated (8/8)                             | 55 (10)    | 254 (28)   | 12 (5)     | 18 (14)    |                    |
| Mismatched unrelated (<8/8)                              | 41 (8)     | 45 (5)     | 35 (15)    | 13 (10)    |                    |
| Unrelated (matching TBD)                                 | 1 (0)      | 1 (0)      | 1 (0)      | 0 (0)      |                    |
| Cord blood                                               | 315 (56)   | 406 (45)   | 125 (53)   | 57 (43)    |                    |
| <b>Graft type - no. (%)</b>                              |            |            |            |            | <.01 <sup>a</sup>  |
| Bone Marrow                                              | 162 (29)   | 391 (44)   | 83 (35)    | 54 (41)    |                    |
| Peripheral Blood                                         | 82 (15)    | 96 (11)    | 28 (12)    | 21 (16)    |                    |
| Cord Blood                                               | 315 (56)   | 406 (45)   | 125 (53)   | 57 (43)    |                    |
| <b>US region of transplant center - no. (%)</b>          |            |            |            |            | <.01 <sup>a</sup>  |
| West                                                     | 232 (42)   | 178 (20)   | 18 (8)     | 63 (48)    |                    |
| Midwest                                                  | 69 (12)    | 302 (34)   | 49 (21)    | 20 (15)    |                    |
| South                                                    | 218 (39)   | 260 (29)   | 145 (61)   | 38 (29)    |                    |
| Northeast                                                | 40 (7)     | 153 (17)   | 24 (10)    | 11 (8)     |                    |
| <b>Insurance - no. (%)</b>                               |            |            |            |            | <.01 <sup>a</sup>  |

|                                           |          |          |          |         |                   |
|-------------------------------------------|----------|----------|----------|---------|-------------------|
| No insurance                              | 18 (3)   | 9 (1)    | 2 (1)    | 6 (5)   |                   |
| Medicaid +/- others                       | 367 (66) | 338 (38) | 160 (68) | 51 (39) |                   |
| Medicare +/- others                       | 7 (1)    | 1 (0)    | 0 (0)    | 0 (0)   |                   |
| Disability insurance +/- others           | 5 (1)    | 6 (1)    | 1 (0)    | 2 (2)   |                   |
| Private health insurance +/- others       | 126 (23) | 479 (54) | 59 (25)  | 64 (48) |                   |
| Other +/- others                          | 31 (6)   | 44 (5)   | 11 (5)   | 7 (5)   |                   |
| Has insurance, source unknown             | 2 (0)    | 3 (0)    | 0 (0)    | 0 (0)   |                   |
| Missing                                   | 3 (1)    | 13 (1)   | 3 (1)    | 2 (2)   |                   |
| <b>Highest Education - no. (%)</b>        |          |          |          |         | 0.95 <sup>a</sup> |
| No primary education                      | 112 (20) | 199 (22) | 56 (24)  | 30 (23) |                   |
| Less than primary or elementary education | 80 (14)  | 130 (15) | 26 (11)  | 17 (13) |                   |
| Primary or elementary education           | 91 (16)  | 170 (19) | 48 (20)  | 28 (21) |                   |
| Lower secondary education                 | 118 (21) | 162 (18) | 52 (22)  | 24 (18) |                   |
| Upper secondary education                 | 57 (10)  | 89 (10)  | 25 (11)  | 14 (11) |                   |
| Post-secondary, non-tertiary education    | 1 (0)    | 1 (0)    | 0 (0)    | 0 (0)   |                   |
| Tertiary education, Type A                | 1 (0)    | 1 (0)    | 0 (0)    | 0 (0)   |                   |



|                                                                               |             |             |             |             |                   |
|-------------------------------------------------------------------------------|-------------|-------------|-------------|-------------|-------------------|
| Advanced research qualification                                               | 0 (0)       | 1 (0)       | 0 (0)       | 0 (0)       |                   |
| Missing                                                                       | 99 (18)     | 140 (16)    | 29 (12)     | 19 (14)     |                   |
| <b>Distance from residence to Transplant center - no. (%)</b>                 |             |             |             |             | <.01 <sup>a</sup> |
| Median (min-max)                                                              | 26 (0-1888) | 47 (0-2005) | 20 (1-1103) | 22 (0-2649) |                   |
| <b>% below national poverty level in Patient's 5-digit ZIP Median (range)</b> | 16 (0-53)   | 10 (0-51)   | 16 (0-58)   | 11 (0-56)   | <.01 <sup>a</sup> |
| <b>Follow-up - median (range)</b>                                             | 59 (5-126)  | 60 (5-128)  | 47 (5-121)  | 52 (11-121) |                   |

Abbreviations: HCT, hematopoietic cell transplantation; SCID Severe combined immunodeficiency; MAC, myeloablative conditioning; TBI, Total Body irradiation; RIC, Reduced intensity conditioning; NMA, Non-myeloablative conditioning; MDS, Myelodysplastic syndrome; PIF, Primary induction failure; CR, Complete remission; HLA, human leukocyte antigen

Table 7: Full model for Overall mortality for Auto HCT

| Parameter                                      | Category                              | HR   | CL_lower | CL_upper | p-value |
|------------------------------------------------|---------------------------------------|------|----------|----------|---------|
| <b>Race</b>                                    | Non-Hispanic White                    | 1.00 | .        | .        | 0.1861  |
|                                                | Non-Hispanic African-American         | 0.91 | 0.81     | 1.03     | 0.1242  |
|                                                | Hispanic                              | 1.04 | 0.87     | 1.25     | 0.6588  |
|                                                | Other                                 | 0.83 | 0.65     | 1.05     | 0.1263  |
| <b>Year of transplant</b>                      | 2009-10                               | 1.00 | .        | .        | <.0001  |
|                                                | 2011-12                               | 0.89 | 0.77     | 1.03     | 0.1305  |
|                                                | 2013-14                               | 0.78 | 0.69     | 0.90     | 0.0004  |
|                                                | 2015-16                               | 0.72 | 0.62     | 0.83     | <.0001  |
|                                                | 2017-18                               | 0.60 | 0.50     | 0.72     | <.0001  |
| <b>Age</b>                                     | 18-29                                 | 1.00 | .        | .        | <.0001  |
|                                                | 30-39                                 | 0.92 | 0.61     | 1.37     | 0.6731  |
|                                                | 40-49                                 | 1.22 | 0.85     | 1.74     | 0.2838  |
|                                                | 50-59                                 | 1.61 | 1.13     | 2.29     | 0.0082  |
|                                                | 60-69                                 | 1.90 | 1.34     | 2.70     | 0.0003  |
|                                                | 70+                                   | 2.51 | 1.73     | 3.65     | <.0001  |
| <b>Sex</b>                                     | Male                                  | 1.00 | .        | .        | <.0001  |
|                                                | Female                                | 0.83 | 0.75     | 0.91     | <.0001  |
| <b>Disease</b>                                 | Non hodgkin's lymphoma                | 1.00 | .        | .        | <.0001  |
|                                                | Hodgkin's lymphoma                    | 0.57 | 0.45     | 0.73     | <.0001  |
|                                                | Plasma cell disorder/Multiple myeloma | 0.75 | 0.62     | 0.90     | 0.0023  |
| <b>Disease status (lymphoma)</b>               | CR                                    | 1.00 | .        | .        | <.0001  |
|                                                | PR                                    | 1.57 | 1.34     | 1.84     | <.0001  |
|                                                | Chemoresistant                        | 2.72 | 2.09     | 3.55     | <.0001  |
|                                                | Unknown                               | 2.26 | 1.06     | 4.81     | 0.0345  |
| <b>Disease status prior to transplant (MM)</b> | SCR/CR                                | 1.00 | .        | .        | <.0001  |
|                                                | VGPR                                  | 1.12 | 0.94     | 1.35     | 0.2074  |
|                                                | PR                                    | 1.22 | 1.02     | 1.45     | 0.0290  |
|                                                | SD                                    | 1.42 | 1.11     | 1.83     | 0.0059  |
|                                                | PD/Relapse                            | 3.09 | 2.30     | 4.17     | <.0001  |
|                                                | Missing                               | 1.59 | 0.59     | 4.33     | 0.3598  |
| <b>HCT-CI</b>                                  | 0                                     | 1.00 | .        | .        | <.0001  |
|                                                | 1-2                                   | 1.03 | 0.91     | 1.17     | 0.6010  |
|                                                | 3+                                    | 1.38 | 1.23     | 1.55     | <.0001  |
|                                                | Missing                               | 1.08 | 0.85     | 1.36     | 0.5359  |

|                        |                                       |      |      |      |        |
|------------------------|---------------------------------------|------|------|------|--------|
| <b>Karnofsky score</b> | 80-100                                | 1.00 | .    | .    | <.0001 |
|                        | <80                                   | 1.49 | 1.31 | 1.70 | <.0001 |
|                        | Missing                               | 1.03 | 0.75 | 1.43 | 0.8344 |
| <b>Marital status</b>  | Married                               | 1.00 | .    | .    | 0.0006 |
|                        | Single/separated/<br>divorced/widowed | 1.23 | 1.10 | 1.36 | 0.0001 |

Table 8: Full Model for overall mortality in adult patients undergoing allo HCT

| Parameter                                    | Category                      | HR   | CL_lower | CL_upper | p-value |
|----------------------------------------------|-------------------------------|------|----------|----------|---------|
| <b>Race</b>                                  | Non-Hispanic White            | 1.00 | .        | .        | 0.0242  |
|                                              | Non-Hispanic African-American | 1.13 | 1.04     | 1.22     | 0.0041  |
|                                              | Hispanic                      | 1.01 | 0.92     | 1.10     | 0.8888  |
|                                              | Other                         | 0.97 | 0.87     | 1.07     | 0.5045  |
| <b>Year of tx</b>                            | 2009-10                       | 1.00 | .        | .        | <.0001  |
|                                              | 2011-12                       | 0.91 | 0.85     | 0.98     | 0.0137  |
|                                              | 2013-14                       | 0.81 | 0.76     | 0.86     | <.0001  |
|                                              | 2015-16                       | 0.78 | 0.73     | 0.83     | <.0001  |
|                                              | 2017-18                       | 0.66 | 0.61     | 0.71     | <.0001  |
| <b>Age</b>                                   | 18-29                         | 1.00 | .        | .        | <.0001  |
|                                              | 30-39                         | 1.05 | 0.94     | 1.17     | 0.4107  |
|                                              | 40-49                         | 1.16 | 1.05     | 1.28     | 0.0034  |
|                                              | 50-59                         | 1.42 | 1.29     | 1.56     | <.0001  |
|                                              | 60-69                         | 1.62 | 1.47     | 1.78     | <.0001  |
|                                              | 70+                           | 1.85 | 1.64     | 2.09     | <.0001  |
| <b>Disease</b>                               | AML                           | 1.00 | .        | .        | <.0001  |
|                                              | ALL                           | 0.88 | 0.81     | 0.95     | 0.0010  |
|                                              | Other leukemia                | 1.06 | 0.91     | 1.22     | 0.4668  |
|                                              | MDS/MPD                       | 0.91 | 0.86     | 0.96     | 0.0006  |
|                                              | NHL                           | 0.78 | 0.71     | 0.85     | <.0001  |
|                                              | HL                            | 0.71 | 0.59     | 0.85     | 0.0002  |
| <b>Donor</b>                                 | HLA-id sib                    | 1.00 | .        | .        | <.0001  |
|                                              | Other related                 | 1.26 | 1.14     | 1.41     | <.0001  |
|                                              | Well matched URD              | 1.07 | 1.02     | 1.14     | 0.0127  |
|                                              | Partially matched URD         | 1.39 | 1.28     | 1.52     | <.0001  |
|                                              | Mismatched URD                | 1.61 | 1.18     | 2.18     | 0.0024  |
|                                              | Multidonor                    | 1.37 | 0.91     | 2.05     | 0.1276  |
|                                              | Unrelated. Matched unknown    | 1.58 | 0.90     | 2.77     | 0.1093  |
|                                              | Cord blood                    | 1.49 | 1.36     | 1.63     | <.0001  |
| <b>Donor-recipient CMV match (not Cords)</b> | +/+                           | 1.00 | .        | .        | 0.0014  |
|                                              | +/-                           | 1.00 | 0.92     | 1.08     | 0.9094  |
|                                              | -/+                           | 1.05 | 0.99     | 1.11     | 0.1343  |
|                                              | -/-                           | 0.91 | 0.86     | 0.98     | 0.0063  |
|                                              | Missing                       | 1.00 | 0.78     | 1.29     | 0.9963  |
| <b>Disease Risk index</b>                    | Low                           | 1.00 | .        | .        | <.0001  |
|                                              | Intermediate                  | 1.35 | 1.21     | 1.51     | <.0001  |
|                                              | High                          | 2.21 | 1.98     | 2.47     | <.0001  |

|                                  |                                |      |      |      |        |
|----------------------------------|--------------------------------|------|------|------|--------|
|                                  | Very high                      | 2.72 | 2.35 | 3.15 | <.0001 |
|                                  | N/A                            | 1.67 | 1.45 | 1.93 | <.0001 |
|                                  | Missing                        | 1.83 | 1.55 | 2.18 | <.0001 |
| <b>Donor-recipient sex match</b> | M-M                            | 1.00 | .    | .    | 0.0041 |
|                                  | M-F                            | 0.96 | 0.91 | 1.02 | 0.2074 |
|                                  | F-M                            | 1.09 | 1.02 | 1.16 | 0.0081 |
|                                  | F-F                            | 0.96 | 0.89 | 1.03 | 0.2188 |
|                                  | Missing                        | 1.04 | 0.62 | 1.76 | 0.8788 |
| <b>GVHD prophylaxis</b>          | T-depletion                    | 1.00 | .    | .    | <.0001 |
|                                  | CD34 select                    | 0.65 | 0.47 | 0.88 | 0.0063 |
|                                  | Cyclophosphamide               | 0.69 | 0.51 | 0.92 | 0.0117 |
|                                  | FK506 +/- MMF +/- MTX          | 0.76 | 0.57 | 1.02 | 0.0668 |
|                                  | CSA +/- MMF +/- MTX            | 0.86 | 0.64 | 1.15 | 0.3019 |
|                                  | Other GVHD prophylaxis         | 0.86 | 0.61 | 1.20 | 0.3672 |
|                                  | Missing                        | 0.94 | 0.64 | 1.39 | 0.7703 |
| <b>HCT-CI</b>                    | 0                              | 1.00 | .    | .    | <.0001 |
|                                  | 1-2                            | 1.09 | 1.02 | 1.16 | 0.0105 |
|                                  | 3+                             | 1.35 | 1.27 | 1.44 | <.0001 |
|                                  | Missing                        | 1.11 | 1.00 | 1.24 | 0.0494 |
| <b>Insurance</b>                 | Private                        | 1.00 | .    | .    | <.0001 |
|                                  | No insurance                   | 1.08 | 0.85 | 1.36 | 0.5458 |
|                                  | Medicaid +/- other             | 1.15 | 1.08 | 1.24 | <.0001 |
|                                  | Medicare +/- other             | 1.08 | 1.02 | 1.15 | 0.0102 |
|                                  | Disability insurance +/- other | 0.99 | 0.85 | 1.15 | 0.8960 |
|                                  | Other                          | 1.04 | 0.91 | 1.19 | 0.5511 |
|                                  | Has insurance, unknown type    | 2.01 | 1.34 | 3.01 | 0.0007 |
|                                  | Missing                        | 0.74 | 0.55 | 0.99 | 0.0444 |
| <b>Karnofsky score</b>           | 80-100                         | 1.00 | .    | .    | <.0001 |
|                                  | <80                            | 1.27 | 1.19 | 1.35 | <.0001 |
|                                  | Missing                        | 1.04 | 0.87 | 1.25 | 0.6467 |

Table 9: Stratified analysis by donor type for overall mortality in adult patients undergoing allo HCT

| <b>Donor</b>                      | <b>Race Category</b>          | <b>HR</b> | <b>CL_lower</b> | <b>CL_upper</b> | <b>p-value</b> |
|-----------------------------------|-------------------------------|-----------|-----------------|-----------------|----------------|
| HLA-identical sib                 | Non-Hispanic White            | 1.00      | .               | .               | 0.6966         |
|                                   | Non-Hispanic African-American | 0.99      | 0.83            | 1.19            | 0.9160         |
|                                   | Hispanic                      | 0.92      | 0.78            | 1.09            | 0.3271         |
|                                   | Other                         | 0.92      | 0.74            | 1.14            | 0.4247         |
| Other related                     | Non-Hispanic White            | 1.00      | .               | .               | 0.5810         |
|                                   | Non-Hispanic African-American | 1.10      | 0.92            | 1.31            | 0.2991         |
|                                   | Hispanic                      | 0.99      | 0.79            | 1.25            | 0.9375         |
|                                   | Other                         | 1.15      | 0.87            | 1.52            | 0.3330         |
| Matched unrelated donor           | Non-Hispanic White            | 1.00      | .               | .               | 0.0057         |
|                                   | Non-Hispanic African-American | 1.40      | 1.16            | 1.70            | 0.0004         |
|                                   | Hispanic                      | 1.04      | 0.86            | 1.24            | 0.6929         |
|                                   | Other                         | 1.04      | 0.86            | 1.26            | 0.7056         |
| Partially matched unrelated donor | Non-Hispanic White            | 1.00      | .               | .               | 0.0003         |
|                                   | Non-Hispanic African-American | 1.53      | 1.20            | 1.96            | 0.0007         |
|                                   | Hispanic                      | 0.93      | 0.71            | 1.21            | 0.5750         |
|                                   | Other                         | 0.68      | 0.46            | 0.99            | 0.0455         |
| Cord blood                        | Non-Hispanic White            | 1.00      | .               | .               | 0.1152         |
|                                   | Non-Hispanic African-American | 1.10      | 0.93            | 1.30            | 0.2663         |
|                                   | Hispanic                      | 1.22      | 1.03            | 1.44            | 0.0211         |
|                                   | Other                         | 1.02      | 0.83            | 1.25            | 0.8486         |

Table 10: Full model for overall mortality for pediatric patients undergoing allo HCT

| Parameter                                      | Category                      | HR   | CL_lower | CL_upper | p-value |
|------------------------------------------------|-------------------------------|------|----------|----------|---------|
| <b>Race</b>                                    | Non-Hispanic White            | 1.00 | .        | .        | <.0001  |
|                                                | Non-Hispanic African-American | 1.62 | 1.30     | 2.03     | <.0001  |
|                                                | Hispanic                      | 1.17 | 0.97     | 1.41     | 0.0992  |
|                                                | Other                         | 1.47 | 1.11     | 1.96     | 0.0079  |
| <b>Year of tx</b>                              | 2009-10                       | 1.00 | .        | .        | <.0001  |
|                                                | 2011-12                       | 1.05 | 0.83     | 1.32     | 0.7081  |
|                                                | 2013-14                       | 0.75 | 0.61     | 0.93     | 0.0080  |
|                                                | 2015-16                       | 0.53 | 0.42     | 0.68     | <.0001  |
|                                                | 2017-18                       | 0.71 | 0.54     | 0.92     | 0.0112  |
| <b>Disease</b>                                 | AML                           | 1.00 | .        | .        | 0.0243  |
|                                                | ALL                           | 0.82 | 0.69     | 0.98     | 0.0306  |
|                                                | MDS/MPD                       | 1.09 | 0.82     | 1.43     | 0.5588  |
|                                                | NHL                           | 1.55 | 1.00     | 2.38     | 0.0490  |
|                                                | HL                            | 0.68 | 0.25     | 1.85     | 0.4515  |
| <b>Disease status at time of HCT (AML/ALL)</b> | CR1                           | 1.00 | .        | .        | <.0001  |
|                                                | CR2                           | 1.18 | 0.98     | 1.42     | 0.0846  |
|                                                | >=CR3                         | 1.70 | 1.23     | 2.35     | 0.0013  |
|                                                | PIF                           | 1.85 | 1.30     | 2.64     | 0.0006  |
|                                                | Relapse                       | 3.00 | 2.23     | 4.03     | <.0001  |
| <b>HCT-CI</b>                                  | 0                             | 1.00 | .        | .        | 0.0013  |
|                                                | 1-2                           | 1.21 | 0.99     | 1.47     | 0.0603  |
|                                                | 3+                            | 1.49 | 1.22     | 1.82     | 0.0001  |
|                                                | Missing                       | 1.08 | 0.78     | 1.51     | 0.6370  |
| <b>Recipient CMV status</b>                    | Negative                      | 1.00 | .        | .        | <.0001  |
|                                                | Positive                      | 1.63 | 1.38     | 1.93     | <.0001  |
|                                                | Unknown                       | 1.66 | 0.81     | 3.41     | 0.1659  |
